# Supplementary material
Source: MDPI journal article supplement (https://www.mdpi.com/2313-433X/8/2/38)
Supplement: s1 [file s1]

# **Supplementary material of “Natural images allow universal adversarial attacks on medical image classification using deep neural networks with transfer learning”**

**Akinori Minagi<sup>1</sup>, Hokuto Hirano<sup>1</sup>, Kazuhiro Takemoto<sup>1\*</sup>**

*1) Department of Bioscience and Bioinformatics, Kyushu Institute of Technology, Iizuka, Fukuoka 820-8502, Japan*

*\*Corresponding author's e-mail: [takemoto@bio.kyutech.ac.jp](mailto:takemoto@bio.kyutech.ac.jp)*

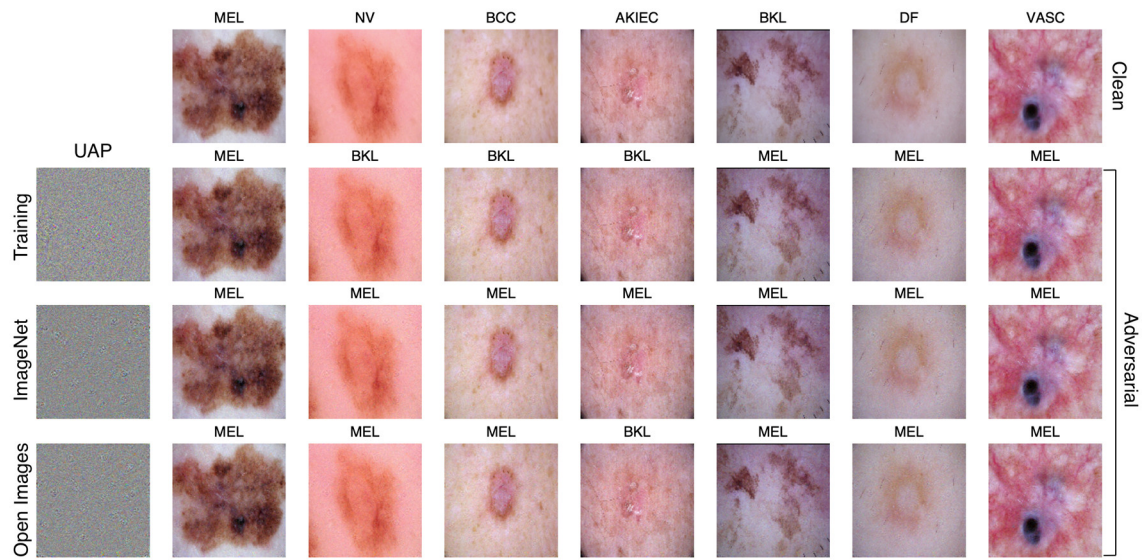

**Figure S1:** Clean images and their adversarial examples generated using nontargeted UAPs from the training, ImageNet, and Open Images datasets, against Inception V3 model for the skin lesion image classifications. Labels beside the images are the predicted classes. The clean (original) images are correctly classified into their actual labels.

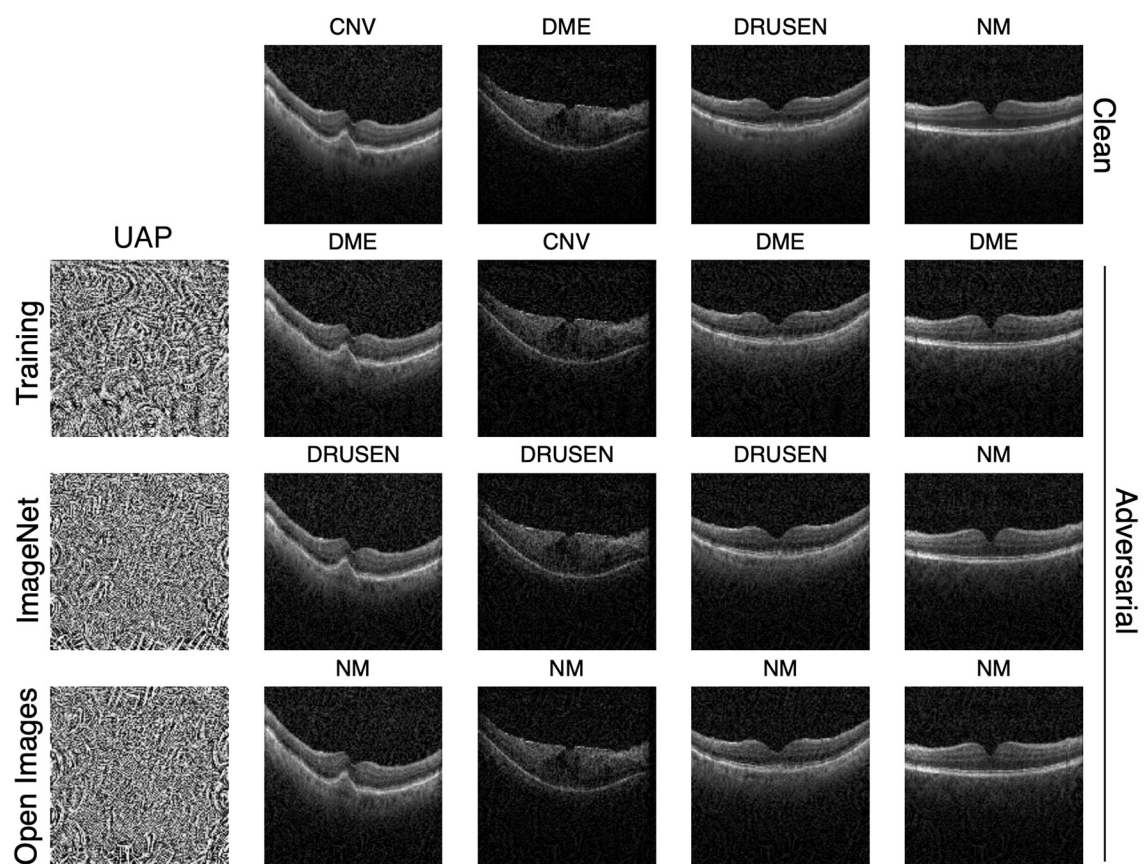

**Figure S2:** Clean images and their adversarial examples generated using nontargeted UAPs from the training, ImageNet, and Open Images datasets, against Inception V3 model for the OCT image classifications. Labels beside the images are the predicted classes. The clean (original) images are correctly classified into their actual labels.

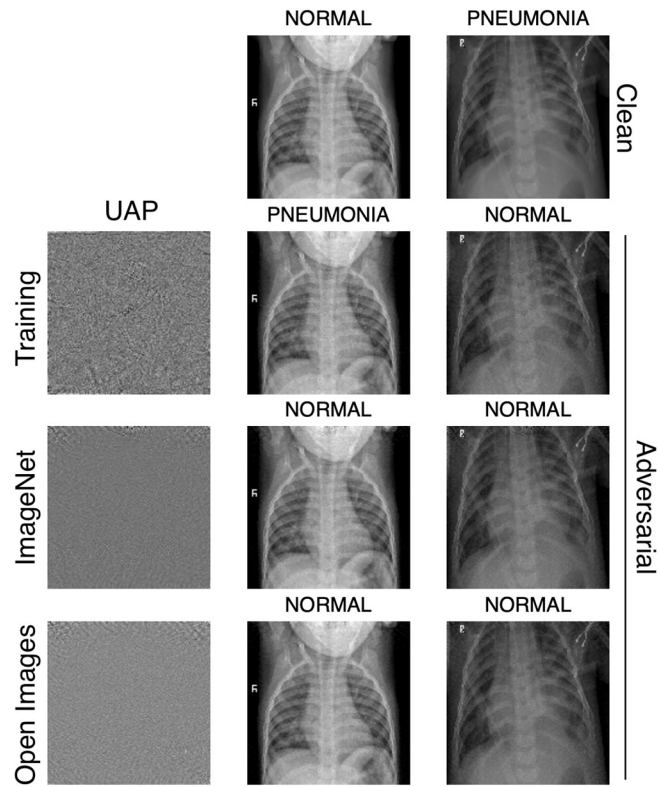

**Figure S3:** Clean images and their adversarial examples generated using nontargeted UAPs from the training, ImageNet, and Open Images datasets, against Inception V3 model for the chest X-ray image classifications. Labels beside the images are the predicted classes. The clean (original) images are correctly classified into their actual labels.

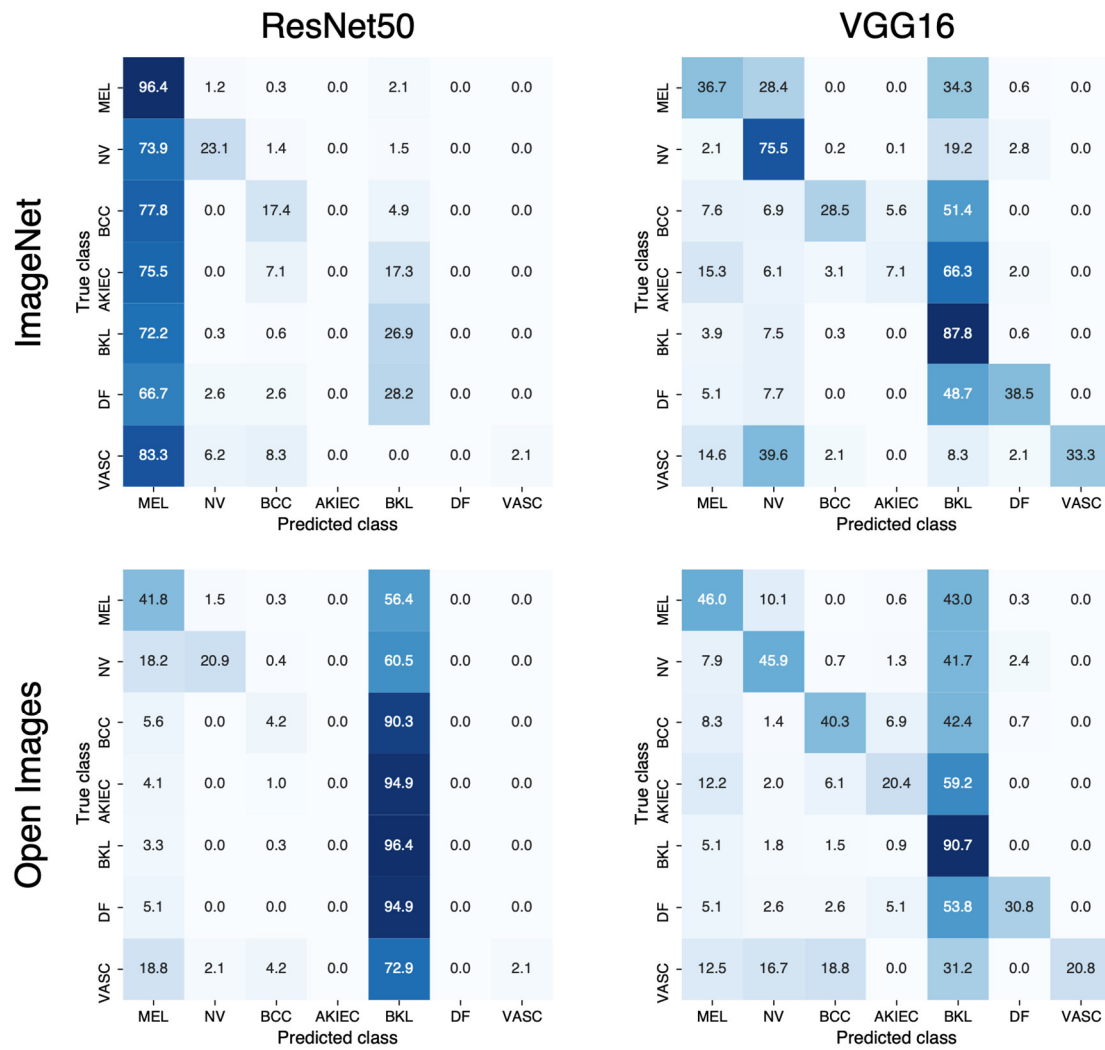

**Figure S4:** Normalized confusion matrices for ResNet50 and VGG16 models attacked using nontargeted UAPs from ImageNet and Open Images datasets for skin lesions image classifications.

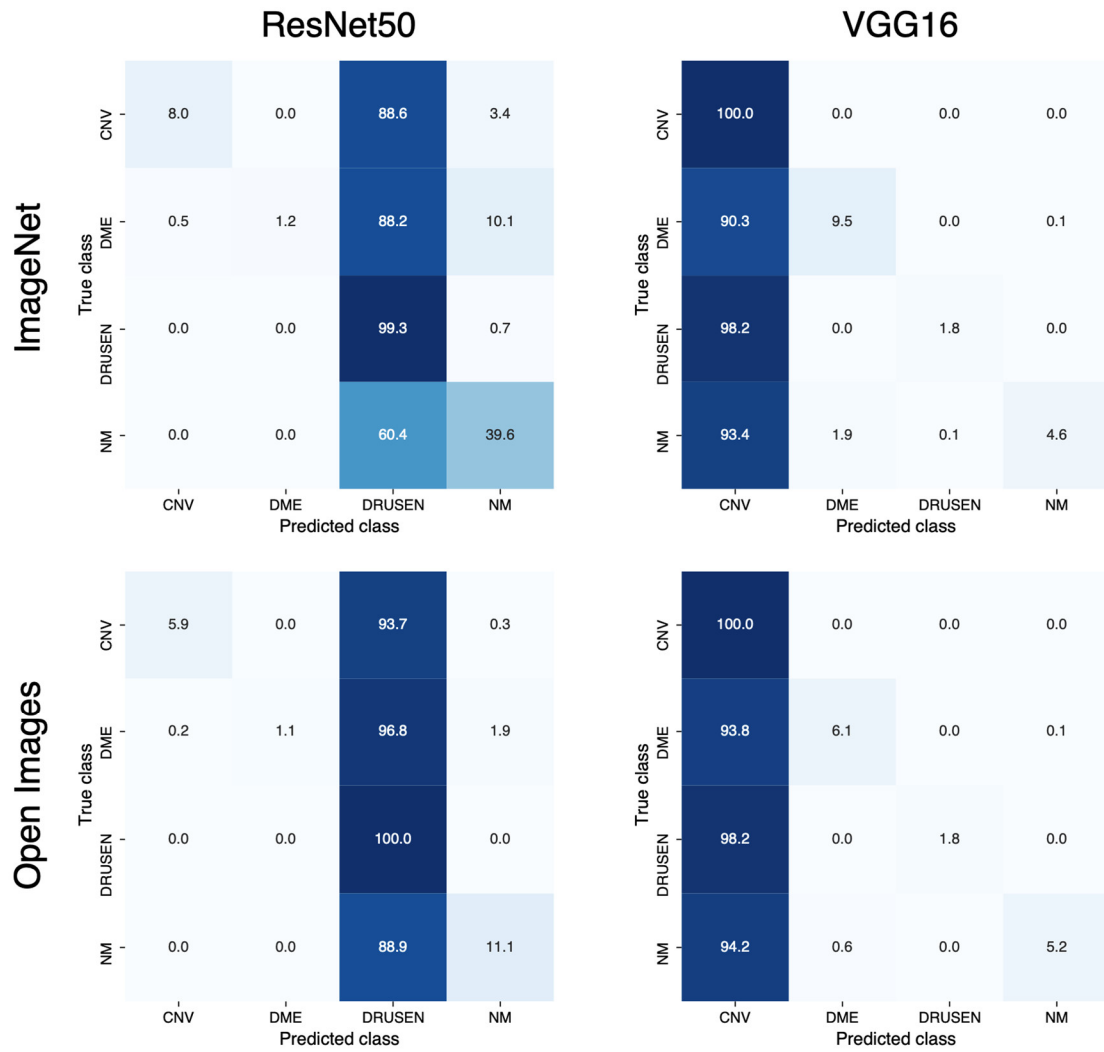

**Figure S5:** Normalized confusion matrices for ResNet50 and VGG16 models attacked using nontargeted UAPs from ImageNet and Open Images datasets for OCT image classifications.

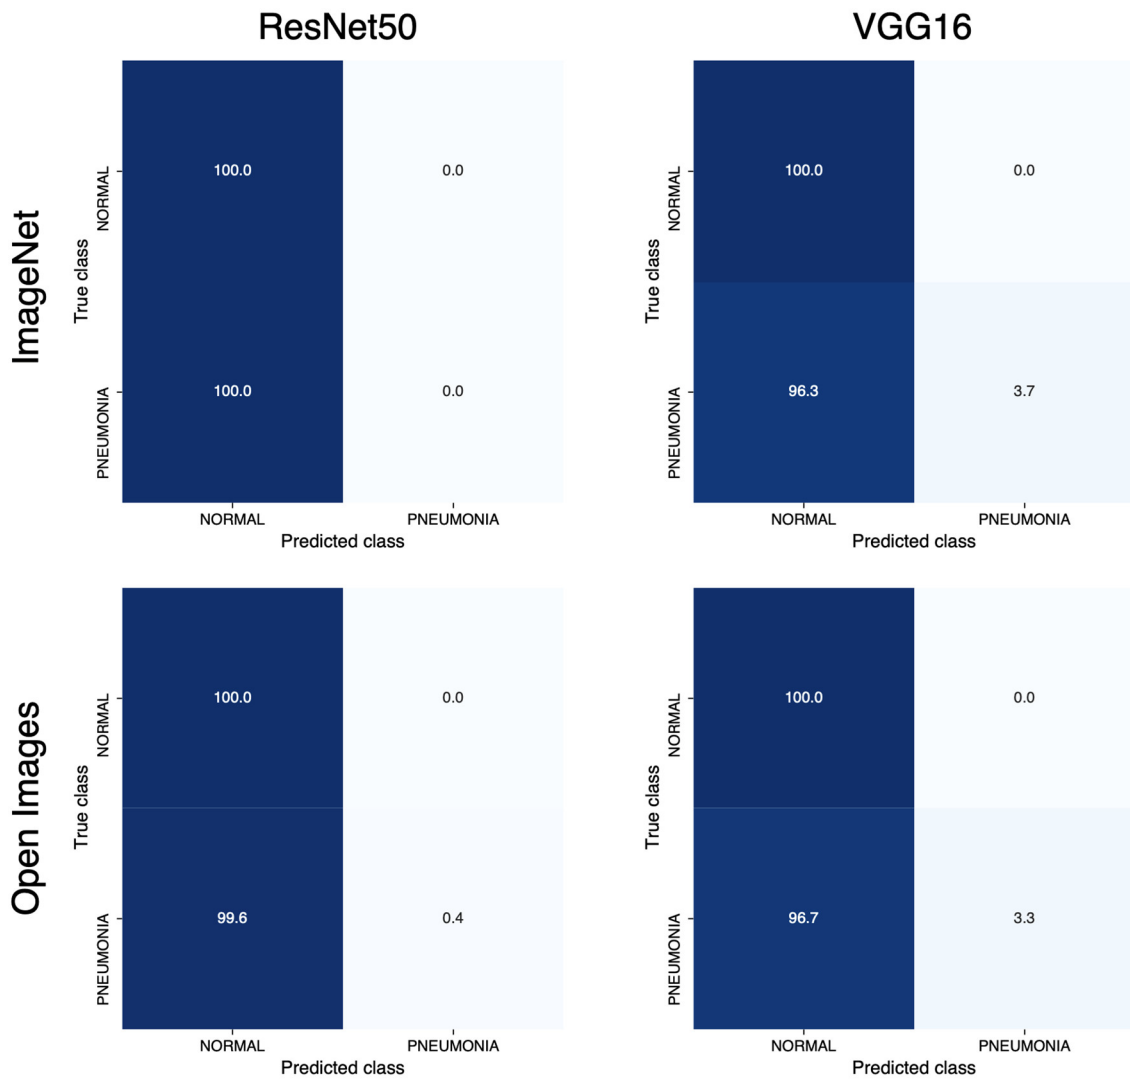

**Figure S6:** Normalized confusion matrices for ResNet50 and VGG16 models attacked using nontargeted UAPs from ImageNet and Open Images datasets for chest X-ray image classifications.

**Table S1:** Composition of the predicted labels of ImageNet and Open Images datasets from Inception V3, ResNet50, and VGG16 models for skin lesion image classification. Each dataset consists of randomly selected 100000 images.

| Predicted labels | Inception V3 |             | ResNet50 |             | VGG16    |             |
|------------------|--------------|-------------|----------|-------------|----------|-------------|
|                  | ImageNet     | Open Images | ImageNet | Open Images | ImageNet | Open Images |
| MEL              | 1722         | 803         | 14219    | 11776       | 5809     | 6768        |
| NV               | 43649        | 41742       | 56716    | 66536       | 78906    | 76445       |
| BCC              | 6556         | 7778        | 6471     | 4579        | 1844     | 2813        |
| AKIEC            | 478          | 775         | 363      | 371         | 26       | 42          |
| BKL              | 45563        | 46886       | 21709    | 15898       | 12730    | 12647       |
| DF               | 459          | 285         | 109      | 112         | 151      | 226         |
| VASC             | 1573         | 1731        | 413      | 728         | 534      | 1059        |

**Table S2:** Composition of the predicted labels of ImageNet and Open Images datasets from Inception V3, ResNet50, and VGG16 models for OCT image classification. Each dataset consists of randomly selected 100000 images.

| Predicted labels | Inception V3 |             | ResNet50 |             | VGG16    |             |
|------------------|--------------|-------------|----------|-------------|----------|-------------|
|                  | ImageNet     | Open Images | ImageNet | Open Images | ImageNet | Open Images |
| CNV              | 33705        | 27581       | 92188    | 90611       | 62837    | 64580       |
| DME              | 53679        | 56899       | 1244     | 1267        | 34244    | 32294       |
| DRUSEN           | 7075         | 9337        | 5201     | 6836        | 1685     | 1739        |
| NM               | 5541         | 6183        | 1367     | 1286        | 1234     | 1387        |

**Table S3:** Composition of the predicted labels of ImageNet and Open Images datasets from Inception V3, ResNet50, and VGG16 models for chest X-ray image classification. Each dataset consists of randomly selected 100000 images.

| Predicted labels | Inception V3 |             | ResNet50 |             | VGG16    |             |
|------------------|--------------|-------------|----------|-------------|----------|-------------|
|                  | ImageNet     | Open Images | ImageNet | Open Images | ImageNet | Open Images |
| NORMAL           | 18157        | 14100       | 19910    | 24069       | 17208    | 18625       |
| PNEUMONIA        | 81843        | 85900       | 80090    | 75931       | 82792    | 81375       |
